# Supplementary material
Source: MDPI journal article supplement (https://www.mdpi.com/2071-1050/10/12/4337)
Supplement: s1 [file s1]

# Supplementary materials

**Table S1.** List of candidate variables for the multivariate analysis. PCA = Principal Component Analysis.

| Variable          | Description                                                                            | Unit                   | Included in the PCA? |
|-------------------|----------------------------------------------------------------------------------------|------------------------|----------------------|
| <i>farm.area</i>  | Farm area                                                                              | hectares               | Yes                  |
| <i>age</i>        | Main household age                                                                     | years                  | Yes                  |
| <i>n.prod</i>     | Number of crops                                                                        | no. of crops           | Yes                  |
| <i>n.pract</i>    | Number of agroecological practices adopted                                             | no. of practices       | Yes                  |
| <i>n.CTA</i>      | Number of extension projects from the local NGO (CTA) in which households were engaged | no. of projects        | Yes                  |
| <i>n.policies</i> | Number of public policies in which households participated                             | no. of public policies | Yes                  |
| <i>n.consum</i>   | Number of food items consumed by the family                                            | no. of food items      | No                   |

**Table S2.** Description of agroecological practices and principles.

| List of agroecological practices and principles |                                                                                               |
|-------------------------------------------------|-----------------------------------------------------------------------------------------------|
| practice                                        | Description                                                                                   |
| compost                                         | Composting of organic residues                                                                |
| repellent_plant                                 | Presence of plants used to repel pests                                                        |
| onfarm_trees                                    | Presence of on-farm trees scattered around the house, around or within the fields             |
| biofert                                         | Use of biofertilisers originated from organic material                                        |
| crop_rotation                                   | Presence of crop rotation systems                                                             |
| alt_pesticide                                   | Use of alternative pesticides originated from organic material                                |
| AFS                                             | Presence of Agroforestry System                                                               |
| no_transgenics                                  | No use of transgenic seeds and crops                                                          |
| alt_feeding                                     | Alternative on-farm feed production (e.g. sugar cane, tree residues, grasses, banana, fruits) |
| manure                                          | Use of animal manure as plant fertilisers                                                     |
| diversification                                 | Presence of more than ten crops in the farming system                                         |
| med_plants                                      | Cultivation and use of medicinal plants                                                       |
| intercropping                                   | Presence of intercropping systems (e.g. maize and beans)                                      |
| mowing                                          | Predominance of mowing instead of uprooting weeds                                             |
| no_fire                                         | No use of fire to manage the fields                                                           |
| no_chemicalfert                                 | No use of chemical fertilisers                                                                |
| race_seeds                                      | Use of at least one variety of local seeds varieties                                          |
| forest_conserv                                  | Presence and conservation of forest patches on the farm                                       |
| Homeop                                          | Use of homeopathy for humans, animals, soil and/or plants                                     |
| water_conser                                    | Conservation of water springs present on the farm                                             |
| family_colaborati<br>on                         | Most family members actively contribute to farm management                                    |
| gender_equity                                   | Recognition of the women's work importance                                                    |
| group_participati<br>on                         | Participation in social organisations, such as farmers unions, associations, and cooperatives |
| labour_exchange                                 | Labour exchange with other farmers in the community                                           |
| popular_culture                                 | Participation and organisation in events to celebrate and reinforce the local culture.        |

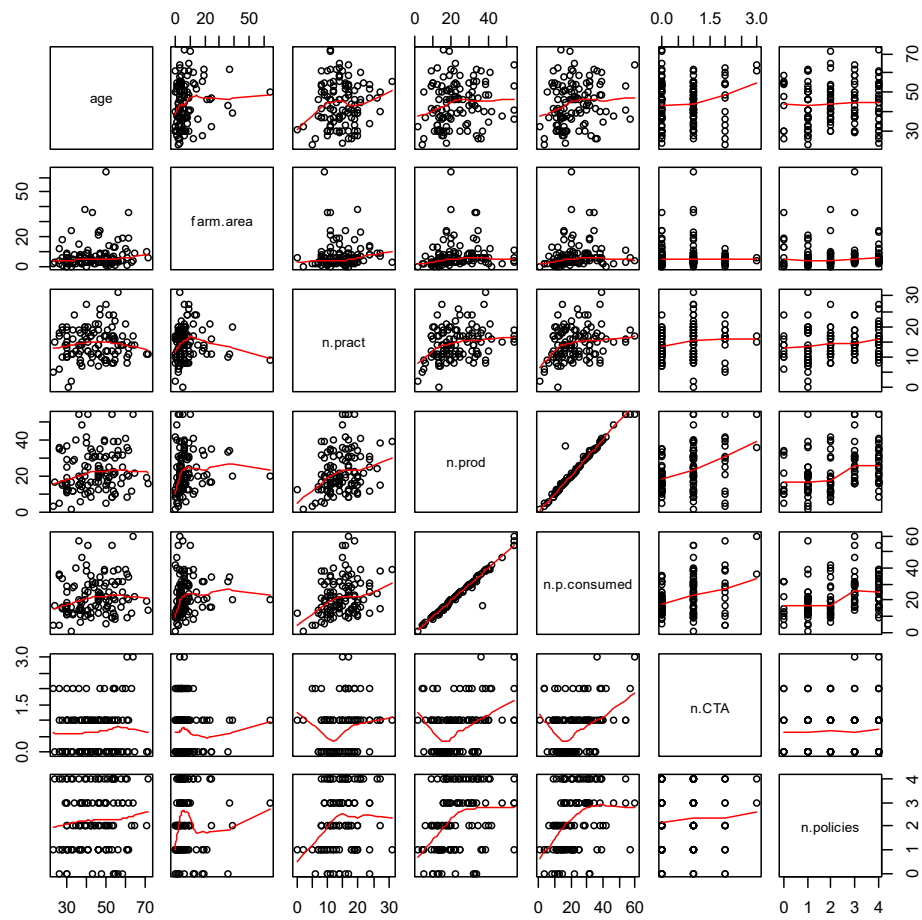

Figure S1. Matrix of scatterplots with candidate variables for the multivariate analysis.

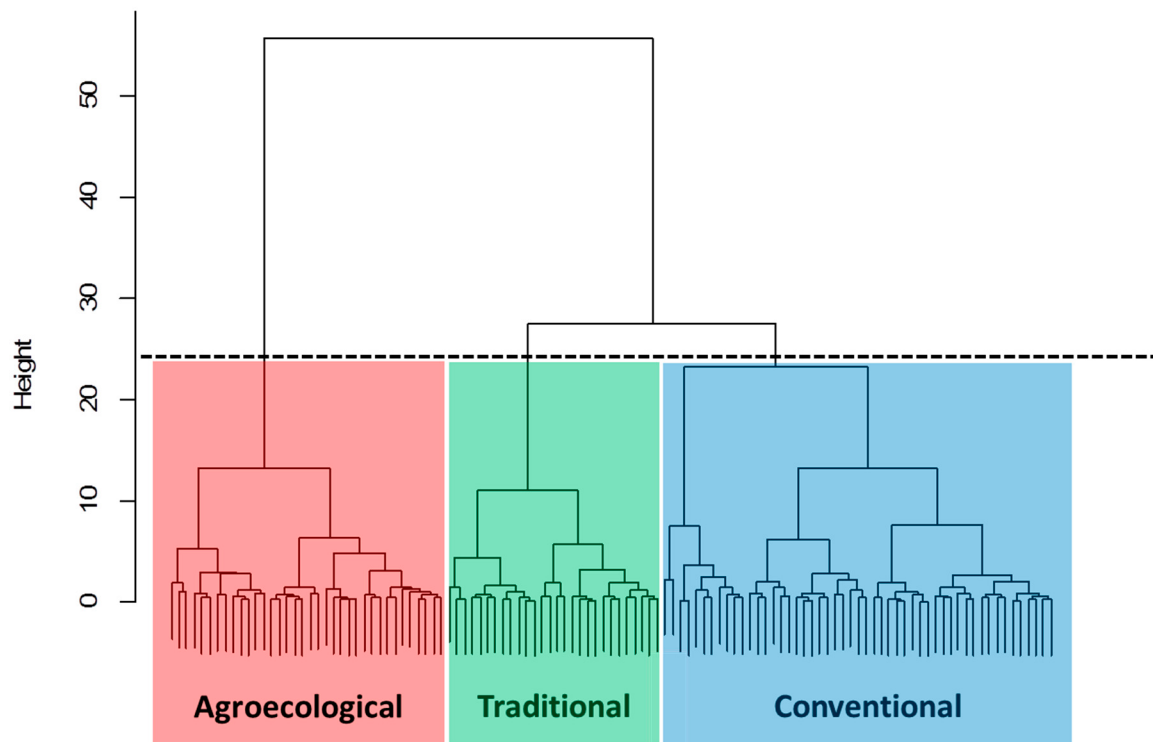

**Figure S2.** Cluster Dendrogram used to select the number of clusters. The dashed line displays the cut-off point that gave the three-cluster solution. The height shown in the vertical axis indicates the level of dissimilarity between merged clusters in different points of the dendrogram.

**Table S3.** Detailed criteria and indicators for characterizing the six main farm types identified in the participatory typology.

|   | Variables                       | Agroecological                                                                                                                                                                                                                                     | Traditional                                                                                                                                                                                                                                                                                    | Conventional                                                                                                                                                                                                  | Part-time Farmers                                                                                                                                                                                                                                          | Large scale Farmers                                                                                                                                                                                                                                            | Landless Farmers                                                                                                                                                                                                                                                                                              |
|---|---------------------------------|----------------------------------------------------------------------------------------------------------------------------------------------------------------------------------------------------------------------------------------------------|------------------------------------------------------------------------------------------------------------------------------------------------------------------------------------------------------------------------------------------------------------------------------------------------|---------------------------------------------------------------------------------------------------------------------------------------------------------------------------------------------------------------|------------------------------------------------------------------------------------------------------------------------------------------------------------------------------------------------------------------------------------------------------------|----------------------------------------------------------------------------------------------------------------------------------------------------------------------------------------------------------------------------------------------------------------|---------------------------------------------------------------------------------------------------------------------------------------------------------------------------------------------------------------------------------------------------------------------------------------------------------------|
|   | General characteristics         | Farmers with high level of autonomy and strong connection with nature. They have diversified production systems, make little use of external inputs, adopt innovative farming practices and are part of social organisations in the region.        | Traditional family farmers still hold peasant characteristics, such as cultivation of diversified home-gardens for self-consumption and focus on family labour, which contributes for their autonomy and food sovereignty. However, pesticides and artificial fertilisers are also often used. | The focus of this farm type is coffee production for the market. Farms are less diversified, with high use of inputs. A large proportion of food for self-consumption is commonly purchased.                  | Farmers in this type have parallel jobs to their farming activities. Usually, the main farming activity is coffee production for the market, which may be combined with other crops.                                                                       | Large farm size, high coffee productivity with high use of external inputs and hired labour.                                                                                                                                                                   | In this type, farmers don't have the ownership of the land, although they work as farmers in somebody else's land. They do not have autonomy to manage the land. They are submissive to the landlord orders.                                                                                                  |
|   | Variations within the farm type | Agroecological farmers are a very diverse group. They diversify their production according to local conditions and knowledge. A group of agroecological farmers don't make any use of chemical fertilisers, and therefore, are considered organic. | They diversify their production, however, some farmers still adopt traditional practices such as fire and intensive "capina" combined or not with the use of pesticides. Some farmers are stopping practices recognised nowadays as harmful for the environment.                               | Although conventional farmers are more market oriented than the other family farmer types, they also preserve peasant characteristics. Within this type, some farmers may adopt some agroecological practices | There are different types of partial farmers. For instance, the people who own and work on a farm and at the same work in the cities, as masons or retailers. There are also the so-called "embarcados": men who stay 15 days on sea, and 15 days farming. | The level of entrepreneurship can vary. Some large farmers still work directly on their farm, while others can be considered business men. Although the focus is coffee and pasture, other crops are grown as well, such as sugar cane and (transgenic) maize. | Landless farmers can work for other farmers as hired workers who are paid per day/week of work, or as "sharecroppers" who live and work on a portion of land owned by the land lord. As a compensation for the use of the land, the share cropper hands over a proportion of the production to the land lord. |
| S | Size of the farm                | Small to medium                                                                                                                                                                                                                                    | Small to medium                                                                                                                                                                                                                                                                                | Small to medium                                                                                                                                                                                               | Small to medium                                                                                                                                                                                                                                            | Medium to large                                                                                                                                                                                                                                                | N/A                                                                                                                                                                                                                                                                                                           |
| S | Inputs and Equipment            | No chemical pesticides use. Artificial fertilisers are used in small quantities if necessary.                                                                                                                                                      | Small or moderate use of pesticides and artificial fertilisers.                                                                                                                                                                                                                                | High use of artificial fertilisers and pesticides. Use                                                                                                                                                        | Small, moderate or high use of artificial fertilisers and                                                                                                                                                                                                  | High use of artificial fertilisers and pesticides. Presence of expensive                                                                                                                                                                                       | The inputs and equipment is commonly provided by the landlord.                                                                                                                                                                                                                                                |

|   |                                       |                                                                                                                                                              |                                                                                                                             |                                                                                                                                  |                                                                                |                                                                                                                  |                                                                                                                                                   |
|---|---------------------------------------|--------------------------------------------------------------------------------------------------------------------------------------------------------------|-----------------------------------------------------------------------------------------------------------------------------|----------------------------------------------------------------------------------------------------------------------------------|--------------------------------------------------------------------------------|------------------------------------------------------------------------------------------------------------------|---------------------------------------------------------------------------------------------------------------------------------------------------|
|   |                                       | Use of on-farm or external manure. Low level of mechanisation, some farmers adapted to family farming.                                                       | Use of on-farm or external manure. No or low level of mechanisation.                                                        | of imported and/or on farm manure. Use of machinery can vary according to the level of assets.                                   | pesticides. Use of imported manure when necessary. Low level of mechanisation. | equipment and machinery.                                                                                         |                                                                                                                                                   |
| F | Production Orientation                | Focus on food sovereignty of the family. Coffee is often sold as the main cash crop. The production surplus of milk, fruits and vegetables can also be sold. | Diversified production for self-consumption and coffee as cash crops for the market.                                        | Highly market oriented.                                                                                                          | Highly market oriented.                                                        | Highly Market-oriented                                                                                           | Market oriented. Production for self-consumption is subordinated to the landlord agreement.                                                       |
| S | Distance to town                      | Variable                                                                                                                                                     | Variable                                                                                                                    | Variable                                                                                                                         | Closer to town                                                                 | Variable                                                                                                         | Variable                                                                                                                                          |
| S | Main household Age                    | Variable                                                                                                                                                     | Usually > 50 year                                                                                                           | Variable                                                                                                                         | Variable                                                                       | Variable                                                                                                         | Variable                                                                                                                                          |
| F | Main income sources                   | Agriculture (different products), sometimes in combination with ecotourism and other activities.                                                             | Agriculture (coffee and milk) and retirement.                                                                               | Agriculture, mainly coffee.                                                                                                      | Agriculture (coffee) and off-farm activities.                                  | Agriculture (coffee and milk) and marketing agricultural products.                                               | Mainly Agriculture. Can also have off-farm jobs in the city.                                                                                      |
| F | Resource endowment                    | Low to medium                                                                                                                                                | Low to medium                                                                                                               | Low to medium                                                                                                                    | Low to medium                                                                  | High                                                                                                             | Low                                                                                                                                               |
| F | Land ownership                        | Land access through governmental policies, "collective land acquisition" <sup>1</sup> , heritage or acquired through their savings.                          | Land access from heritage or through their savings.                                                                         | Land access through governmental policies, heritage or through their savings.                                                    | Land access through governmental policies, heritage or through their savings.  | Land access usually from heritage, through their savings or occupation in the past (e.g. "uso capiao", donation) | N/A                                                                                                                                               |
| F | Labour                                | Mostly family labour. Exchange of labour days with other farmers is common.                                                                                  | Mostly family labour. Part of the labour may be hired.                                                                      | Mostly family labour. Part of the labour may be hired.                                                                           | Partly family labour, partly hired.                                            | Mostly hired labour (e.g., sharecroppers, daily employees)                                                       | Farmers sell their labour force                                                                                                                   |
| F | Participation in social organisations | Actively engaged in social organisations, such as family farmer's unions, cooperatives, and catholic groups of reflection.                                   | Often affiliated to the farmers union, but little actual participation. Commonly part of the catholic groups of reflection. | Can be affiliated to the family farmers union, but little actual participation. Often part of the catholic groups of reflection. | Variable.                                                                      | No participation.                                                                                                | Can be affiliated to the family farmer and rural workers union, but little actual participation. Often part of the catholic groups of reflection. |
| F | Forest conservation                   | Forest patches are preserved. If no forest is present, farmers try to establish trees and fence                                                              | Forest patches are preserved. If no forest is present,                                                                      | Forest patches are preserved. If no forest is present,                                                                           | Little forest area on the farm and little conservation efforts.                | Variable. Forest is sometimes present in small patches, more or                                                  | Conservation efforts dictated by the landlord.                                                                                                    |

|   |               |                                                                                                                         |                                                                                                                                              |                                                                                                                                                                        |                                                                                                                                                     |                                                                                                                                                    |                                                                                                |
|---|---------------|-------------------------------------------------------------------------------------------------------------------------|----------------------------------------------------------------------------------------------------------------------------------------------|------------------------------------------------------------------------------------------------------------------------------------------------------------------------|-----------------------------------------------------------------------------------------------------------------------------------------------------|----------------------------------------------------------------------------------------------------------------------------------------------------|------------------------------------------------------------------------------------------------|
|   |               | water bodies on the farm.                                                                                               | conservation efforts vary.                                                                                                                   | conservation efforts vary.                                                                                                                                             |                                                                                                                                                     | less according to the Brazilian Forest Law.                                                                                                        |                                                                                                |
| F | Pastures      | Presence of trees and low grazing intensity. Alternative feed is provided with banana, tree residues, maize and silage. | Little (or no) presence of trees; low to medium grazing intensity. Additional feed with sugar cane and grasses.                              | No presence of trees. Low to medium grazing intensity. Additional feed is commonly purchased.                                                                          | Usually not present as animals require a daily care.                                                                                                | Intensive production; high number of animals; animals are partly kept in the stable; feed is commonly purchased.                                   | Dictated by the landlord.                                                                      |
| F | Coffee fields | Presence of trees and annual crops; less intensive uproot weeding; frequent mechanical mowing; good soil cover.         | Little (or no) trees; bare soil; frequent and intensive weeding (chemical or coastal mechanical). Annual crops are intercropped with coffee. | Annual crops can be present. No trees; bare soil; frequent and intensive weeding (chemical or coastal mechanical). In some cases uproot weeding is replaced by mowing. | No trees; bare soil; frequent and intensive weeding (chemical or coastal mechanical). In some cases the uproot weeding is being replaced by mowing. | High productivity; no trees; bare soil; frequent an intensive uproot weeding; annual crops are intercropped if land is shared with a sharecropper. | Introduction of annual crops in between the coffee lines for self-consumption.                 |
| F | Homegarden    | Complex homegarden with trees, shrubs, fruits, vegetables and small animals, such as chickens, ducks and pigs.          | Complex homegarden with fruits, vegetables and small animals, such as chickens, ducks and pigs. Trees and shrubs may also be present.        | Small homegarden with only few vegetables and fruits.                                                                                                                  | Usually not present.                                                                                                                                | Usually not present.                                                                                                                               | If the landlord agrees, share croppers tend to create a small homegarden for self-consumption. |

<sup>1</sup> collective land acquisition = purchase of a large piece of land by many farmers who share the land among themselves.

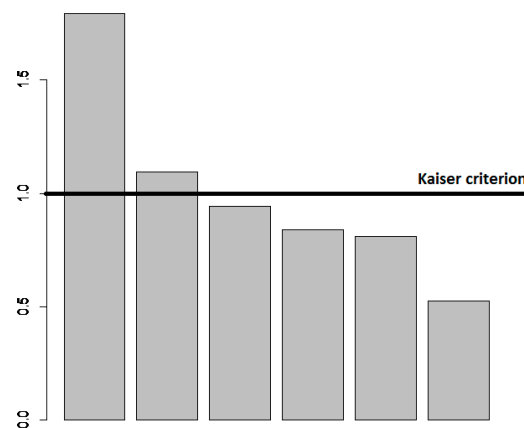

**Figure S3.** Eigenvalues of the PCA.

**Table S4.** Correlation matrix between the principal components (PC's) and the variables used in the multivariate analysis.

| Variables  | PC1             | PC2             | PC3             |
|------------|-----------------|-----------------|-----------------|
| age        | −0.37554        | <b>0.583439</b> | −0.25941        |
| farm.area  | −0.18688        | <b>0.80019</b>  | 0.218673        |
| n.pract    | <b>−0.58626</b> | −0.18811        | 0.103478        |
| n.prod     | <b>−0.80057</b> | −0.04888        | 0.010233        |
| n.CTA      | <b>−0.58919</b> | −0.19782        | <b>−0.61927</b> |
| n.policies | <b>−0.53567</b> | −0.1917         | <b>0.65817</b>  |

**Table S5.** Proportion of farmers in each farm type participating of CTA-ZM projects. Proportions are significantly different among all farm types according to Fisher's test ( $p < 0.001$ ). CTA-ZM stands for the local non-governmental organisation: Centre for Alternative Technologies of Zona da Mata.

| Number of CTA projects | Conventional (%) | Agroecological (%) | Traditional (%) |
|------------------------|------------------|--------------------|-----------------|
| 0                      | 66.7             | 0                  | 58.8            |
| 1                      | 27.0             | 65.7               | 41.2            |
| 2                      | 6.4              | 28.6               | 0               |
| 3                      | 0                | 5.7                | 0               |

**Table S6.** Proportion of farmers in each farm type accessing public policy benefits. Proportions are significantly different among all farm types according to Pearson's Chi-squared test ( $p < 0.01$ ).

| Number of public policies | Conventional (%) | Agroecological (%) | Traditional (%) |
|---------------------------|------------------|--------------------|-----------------|
| 0                         | 7.9              | 0                  | 29.4            |
| 1                         | 33.3             | 14.3               | 17.7            |
| 2                         | 25.4             | 17.1               | 23.5            |
| 3                         | 17.5             | 28.6               | 17.7            |
| 4                         | 15.9             | 40                 | 11.8            |

**Table S7.** Means, standard errors, statistical test and p-values for the five variables used to characterise family farmers in the Zona da Mata, Brazil.

| Variable                           | test           | p-value     | Conventional | Agroecological | Traditional   |
|------------------------------------|----------------|-------------|--------------|----------------|---------------|
| Number of crop products            | ANOVA          | 2.00e-16*** | 16.4 ± 7.2 a | 34.3 ± 10.2 c  | 22.6 ± 7.9 b  |
| Number of agroecological practices | Kruskal-Wallis | 4.18e-06*** | 12.7 ± 4.5 a | 18.4 ± 5.1 b   | 13.5 ± 4.4 a  |
| Age of the household head          | Kruskal-Wallis | 7.18e-06*** | 40.4 ± 9.9 a | 45.6 ± 10.1 b  | 55.7 ± 9.5 c  |
| Farm area (ha)                     | ANOVA          | 2.27e-15*** | 4.4 ± 4.1 a  | 5.62 ± 3.1 a   | 21.6 ± 14.9 b |
| Number of crop products consumed   | ANOVA          | 3.79e-15*** | 16.1 ± 7.3 a | 33.6 ± 11.2 c  | 22.1 ± 8 b    |

**Table S8.** Results from the ad-hoc and post-doc tests for five selected variables. \* Significant at  $p < .05$ ; \*\* Significant at  $p < .01$ ; \*\*\* Significant at  $p < 0.001$ .

| Variables    | Ad-hoc test    | p-value      | Post-doc test | p-values                    |                          |                            |
|--------------|----------------|--------------|---------------|-----------------------------|--------------------------|----------------------------|
|              |                |              |               | agroecological-conventional | traditional-conventional | traditional-agroecological |
| n.prod       | ANOVA          | 2.00e-16***  | Tukey         | 0***                        | 0.01977*                 | 0.00001***                 |
| n.pract      | Kruskal-Wallis | 4.179e-06*** | Dunn          | 0***                        | 0.3985                   | 0.0006**                   |
| Age          | Kruskal-Wallis | 7.177e-06*** | Dunn          | 0.0110*                     | 0***                     | 0.0028**                   |
| farm.area    | ANOVA          | 2.27e-15***  | Tukey         | 0.65266                     | 0***                     | 0***                       |
| n.p.consumed | ANOVA          | 3.79e-15***  | Tukey         | 0***                        | 0.03426*                 | 0.00005***                 |

**Table S9.** Proportion of farmers adopting each agroecological practice per farm type.

| Practices            | Description                                                                                   | %              |             |              |
|----------------------|-----------------------------------------------------------------------------------------------|----------------|-------------|--------------|
|                      |                                                                                               | Agroecological | Traditional | Conventional |
| popular_culture      | Participation and organisation in events to value and reinforce the local culture.            | 28.6           | 5.9         | 4.8          |
| repellent_plant      | Presence of plants used to repel pests                                                        | 45.7           | 11.8        | 12.7         |
| composting           | Composting of organic residues                                                                | 31.4           | 17.6        | 9.5          |
| alt_pesticide        | Use of alternative pesticides originated from organic material                                | 51.4           | 23.5        | 14.3         |
| onfarm_trees         | Presence of on-farm trees scattered around the house, around or within the fields             | 57.1           | 41.2        | 20.6         |
| AFS                  | Presence of agroforestry system                                                               | 42.9           | 35.3        | 19.0         |
| biofert              | Use of biofertilisers originated from organic material                                        | 54.3           | 35.3        | 25.4         |
| no_transgenics       | No use of transgenic seeds and crops                                                          | 88.6           | 41.2        | 41.3         |
| gender_equality      | Recognition of the women's work importance                                                    | 62.9           | 47.1        | 34.9         |
| no_chemicalfert      | No use of chemical fertilisers                                                                | 22.9           | 0.0         | 11.1         |
| water_conserv        | Conservation of water springs on the farm                                                     | 74.3           | 47.1        | 46.0         |
| group_participation  | Participation in social organisations, such as farmers unions, associations, and cooperatives | 82.9           | 64.7        | 46.0         |
| Homeop               | Use of homeopathy for humans, animals, soil and/or plants                                     | 45.7           | 52.9        | 28.6         |
| med_plants           | Cultivation and use of medicinal plants                                                       | 82.9           | 70.6        | 55.6         |
| family_collaboration | Most family members actively contribute to farm management                                    | 74.3           | 52.9        | 50.8         |
| diversification      | Presence of more than ten crops in the farming system                                         | 94.3           | 64.7        | 61.9         |
| manure               | Use of animal manure as plant fertilisers                                                     | 100.0          | 94.1        | 73.0         |
| alt_feeding          | Alternative on-farm feed production                                                           | 74.3           | 76.5        | 55.6         |
| no_fire              | No use of fire to manage the fields                                                           | 85.7           | 64.7        | 71.4         |
| intercropping        | Presence of intercropping systems (e.g. maize and beans)                                      | 85.7           | 70.6        | 69.8         |
| crop_rotation        | Presence of crop rotation systems                                                             | 48.6           | 23.5        | 36.5         |
| labour_exchange      | Labour exchange with other farmers in the community                                           | 65.7           | 58.8        | 63.5         |
| mowing               | Predominance of mowing instead of uprooting weeds                                             | 77.1           | 70.6        | 76.2         |
| race_seeds           | Use of at least one variety of local seeds varieties                                          | 80.0           | 88.2        | 77.8         |
| forest_conserv       | Presence and conservation of forest patches on the farm                                       | 57.1           | 47.1        | 65.1         |
